# Supplementary material for: Aqueous compatibility of group IIIA monomers and Nb-polyoxoanions
Source: Royal Society of Chemistry journal article supplement (doi:10.1039/c2cc31284k), 2012-01-01
Supplement: c2cc31284k.pdf [file c2cc31284k.pdf]

## Supplementary Materials

# Heteropolyniobates from the group IIIA Elements

Yu Hou, May Nyman\*, Todd M Alam and Mark A. Rodriguez

### Table of Contents

General Methods and Materials.

Table S1. Crystal data and structure refinement for **K1**, **Rb1**, **Cs1**, and **K2**

Table S2. The bond length (Å) range in compounds **K1**, **K2**, **Rb1**, and **Cs1**.

Fig. S1. IR spectra of **K1**.

Fig. S2. IR spectra of **K2**.

Fig. S3. X-ray powder diffraction of observed and calculated plots for **K1**.

Fig. S4. X-ray powder diffraction of observed and calculated plots for **K2**.

Fig. S5. Thermogravimetric (blue) differential thermal analysis (red) of **K1**.

Fig. S6. Thermogravimetric (blue) differential thermal analysis (red) of **K2**.

Fig. S7. ESI-MS for **K2**.

Table S3. Species observed by Electrospray ionization mass spectroscopy (ESI-MS) analysis of pure **K1** in H<sub>2</sub>O.

Table S4. Species observed by Electrospray ionization mass spectroscopy (ESI-MS) analysis of pure **K2** in H<sub>2</sub>O.

Figure S8. <sup>17</sup>O NMR of K1 [GaNb<sub>18</sub>O<sub>54</sub>]<sup>15-</sup>

## General Methods and Materials.

Alkali salts of the Lindqvist ion,  $\text{Cs}_8[\text{Nb}_6\text{O}_{19}] \cdot 14\text{H}_2\text{O}$ ,  $\text{Rb}_8[\text{Nb}_6\text{O}_{19}] \cdot 14\text{H}_2\text{O}$ , and  $\text{K}_8[\text{Nb}_6\text{O}_{19}] \cdot 16\text{H}_2\text{O}$  were obtained by methods reported prior, and purity was confirmed by infrared spectroscopy, X-ray powder diffraction and thermogravimetry.  $\text{Ga}(\text{NO}_3)_3 \cdot \text{XH}_2\text{O}$  was purchased from Strem Chemicals.  $\text{Al}(\text{NO}_3)_3 \cdot 9\text{H}_2\text{O}$  was purchased from Fisher Scientific company. Thermal analysis was performed with a TA Instruments SDT 2960 for simultaneous thermogravimetric and differential thermal analysis (TGA-DTA) under air flow with a heating rate of  $10\text{ }^\circ\text{C}/\text{min}$ . Powder X-ray powder diffraction data was performed on a Bruker D8 Advance with  $\text{Cu-K}\alpha$  radiation. Infrared spectra ( $400\text{--}4000\text{ cm}^{-1}$ ) were recorded on a Thermo Nicolet 380 Ft-IR equipped with a Smart Orbit (Diamond) ATR accessory. Solution  $^{27}\text{Al}$  NMR in  $\text{D}_2\text{O}$  was performed on Bruker Ultrashield Plus 500 MHz. Solution  $^{71}\text{Ga}$  NMR in  $\text{D}_2\text{O}$  was performed on Bruker Avance III 600 MHz. Chemical shifts are referenced to pure  $\text{Al}(\text{NO}_3)_3$  and  $\text{Ga}(\text{NO}_3)_3$  as an external reference. Elemental composition was confirmed via energy dispersive spectroscopy (EDS) and referenced to known standards. ESI-MS spectrometry experiments have been carried out on an Agilent Technologies 6224 TOF MS instrument. The  $1.0 \times 10^{-6}\text{ M}\cdot\text{L}^{-1}$  solutions of POMs were infused using a syringe pump ( $300\text{ }\mu\text{l min}^{-1}$ ). Mass spectra were recorded in the negative ion detection mode. The spectrometer was previously calibrated with the standard tune mix to give a precision of about 2 ppm in the region of 50–3200 m/z. Spectra were taken with the following instrumental parameters: nebulizer gas pressure, 30 psi; dry gas flow rate, 5 l/min; dry gas temperature,  $325\text{ }^\circ\text{C}$ ; capillary voltage and current, 3500 V, 0.029  $\mu\text{A}$ ; fragmentor voltage, 100V.

**Table S1.** Crystal data and structure refinement for **K1**, **Rb1**, **Cs1**, and **K2**

|                                                | <b>K1</b>                                                                                   | <b>Rb1</b>                                                                                  | <b>Cs1</b>                                                                                  | <b>K2</b>                                                                                   |
|------------------------------------------------|---------------------------------------------------------------------------------------------|---------------------------------------------------------------------------------------------|---------------------------------------------------------------------------------------------|---------------------------------------------------------------------------------------------|
| Empirical Formula                              | H <sub>62</sub> GaK <sub>14</sub> NaNb <sub>18</sub> O <sub>85</sub>                        | H <sub>70</sub> GaNb <sub>18</sub> O <sub>89</sub> Rb <sub>15</sub>                         | H <sub>24</sub> Cs <sub>13</sub> GaN <sub>a2</sub> Nb <sub>18</sub> O <sub>66</sub>         | H <sub>63</sub> AlK <sub>14</sub> Nb <sub>18</sub> O <sub>85</sub>                          |
| Fw (g·mol <sup>-1</sup> )                      | 3734.99                                                                                     | 4518.71                                                                                     | 4596.10                                                                                     | 3670.26                                                                                     |
| T(K)                                           | 193(2)                                                                                      | 293(2)                                                                                      | 193(2)                                                                                      | 193(2)                                                                                      |
| Radiation (λ, Å)                               | 0.71073                                                                                     | 0.71073                                                                                     | 0.71073                                                                                     | 0.71073                                                                                     |
| Crystal system                                 | orthorhombic                                                                                | triclinic                                                                                   | tetragonal                                                                                  | orthorhombic                                                                                |
| Space group                                    | P2 <sub>1</sub> 2 <sub>1</sub> 2 <sub>1</sub>                                               | <i>P</i> $\bar{1}$                                                                          | <i>P</i> 4 <sub>2</sub> /ncm                                                                | P2 <sub>1</sub> 2 <sub>1</sub> 2 <sub>1</sub>                                               |
| <i>a</i> (Å)                                   | 18.6023(18)                                                                                 | 15.0863(1)                                                                                  | 16.8515(13)                                                                                 | 18.582(3)                                                                                   |
| <i>b</i> (Å)                                   | 18.6225(18)                                                                                 | 17.94(12)                                                                                   | 16.8515(13)                                                                                 | 18.646(3)                                                                                   |
| <i>c</i> (Å)                                   | 24.567(2)                                                                                   | 19.1713(13)                                                                                 | 28.919(3)                                                                                   | 24.646(4)                                                                                   |
| $\alpha$ (°)                                   | 90                                                                                          | 63.539(1)                                                                                   | 90                                                                                          | 90                                                                                          |
| $\beta$ (°)                                    | 90                                                                                          | 82.135(1)                                                                                   | 90                                                                                          | 90                                                                                          |
| $\gamma$ (°)                                   | 90                                                                                          | 79.927(1)                                                                                   | 90                                                                                          | 90                                                                                          |
| <i>V</i> (Å <sup>3</sup> )                     | 8510.7(14)                                                                                  | 4563.3(5)                                                                                   | 8212.1(12)                                                                                  | 8539(2)                                                                                     |
| <i>Z</i>                                       | 4                                                                                           | 2                                                                                           | 4                                                                                           | 4                                                                                           |
| <i>d</i> <sub>calcd</sub> , Mg·m <sup>-3</sup> | 2.915                                                                                       | 3.289                                                                                       | 3.717                                                                                       | 2.855                                                                                       |
| $\mu$ , mm <sup>-1</sup>                       | 3.448                                                                                       | 10.526                                                                                      | 8.518                                                                                       | 3.132                                                                                       |
| GOF                                            | 1.102                                                                                       | 1.014                                                                                       | 1.041                                                                                       | 1.088                                                                                       |
| Final R indices<br>[R>2σ(I)]                   | <i>R</i> <sub>1</sub> <sup>a</sup> = 0.0253<br><i>wR</i> <sub>2</sub> <sup>b</sup> = 0.0621 | <i>R</i> <sub>1</sub> <sup>a</sup> = 0.0321<br><i>wR</i> <sub>2</sub> <sup>b</sup> = 0.0744 | <i>R</i> <sub>1</sub> <sup>a</sup> = 0.0531<br><i>wR</i> <sub>2</sub> <sup>b</sup> = 0.1553 | <i>R</i> <sub>1</sub> <sup>a</sup> = 0.0414<br><i>wR</i> <sub>2</sub> <sup>b</sup> = 0.1019 |
| R indices (all data)                           | <i>R</i> <sub>1</sub> <sup>a</sup> = 0.0271<br><i>wR</i> <sub>2</sub> <sup>b</sup> = 0.0632 | <i>R</i> <sub>1</sub> <sup>a</sup> = 0.0433<br><i>wR</i> <sub>2</sub> <sup>b</sup> = 0.0791 | <i>R</i> <sub>1</sub> <sup>a</sup> = 0.0594<br><i>wR</i> <sub>2</sub> <sup>b</sup> = 0.1624 | <i>R</i> <sub>1</sub> <sup>a</sup> = 0.0460<br><i>wR</i> <sub>2</sub> <sup>b</sup> = 0.1050 |

<sup>a</sup> *R*<sub>1</sub> = Σ||*F*<sub>0</sub>| - |*F*<sub>c</sub>|| / Σ|*F*<sub>0</sub>|;  
<sup>b</sup> *wR*<sub>2</sub> = Σ[*w*(*F*<sub>0</sub><sup>2</sup> - *F*<sub>c</sub><sup>2</sup>)<sup>2</sup>] / Σ[*w*(*F*<sub>0</sub><sup>2</sup>)<sup>2</sup>]<sup>1/2</sup>

**Table S2.** The bond length (Å) range in compounds **K1**, **K2**, **Rb1**, and **Cs1**.

| Bond               | <b>K1</b>                                                      | <b>K2</b>   | <b>Rb1</b>  | <b>Cs1</b>  |
|--------------------|----------------------------------------------------------------|-------------|-------------|-------------|
| Ga(Al)-O           | 1.807-1.851                                                    | 1.747-1.788 | 1.809-1.852 | 1.812-1.849 |
| Nb-O <sub>t</sub>  | 1.733-1.781                                                    | 1.726-1.781 | 1.739-1.797 | 1.734-1.789 |
| Nb-O <sub>b1</sub> | 1.820-2.117                                                    | 1.801-2.109 | 1.814-2.116 | 1.823-2.045 |
| Nb-O <sub>b2</sub> | 2.079-2.139                                                    | 2.080-2.133 | 2.072-2.125 | 2.089-2.115 |
| Nb-O <sub>c1</sub> | 2.250-2.524                                                    | 2.243-2.522 | 2.246-2.510 | 2.265-2.492 |
| Nb-O <sub>c2</sub> | 2.079-2.106                                                    | 2.092-2.128 | 2.082-2.099 | 2.092-2.092 |
| Nb-O <sub>c3</sub> | 2.260-2.309                                                    | 2.289-2.333 | 2.256-2.307 | 2.274-2.293 |
| Nb-O <sub>t</sub>  | t=terminal or yl oxygen, bonded to one Nb                      |             |             |             |
| Nb-O <sub>b1</sub> | b=bridging oxygen, bonded to two Nb atoms                      |             |             |             |
| Nb-O <sub>b2</sub> | b=bridging oxygen, bonded to three Nb atoms                    |             |             |             |
| Nb-O <sub>c1</sub> | c=central oxygen, bonded to six Nb atoms                       |             |             |             |
| Nb-O <sub>c2</sub> | c=central oxygen, bonded to two Nb atoms and one Ga(Al) atom   |             |             |             |
| Nb-O <sub>c3</sub> | c=central oxygen, bonded to three Nb atoms and one Ga(Al) atom |             |             |             |

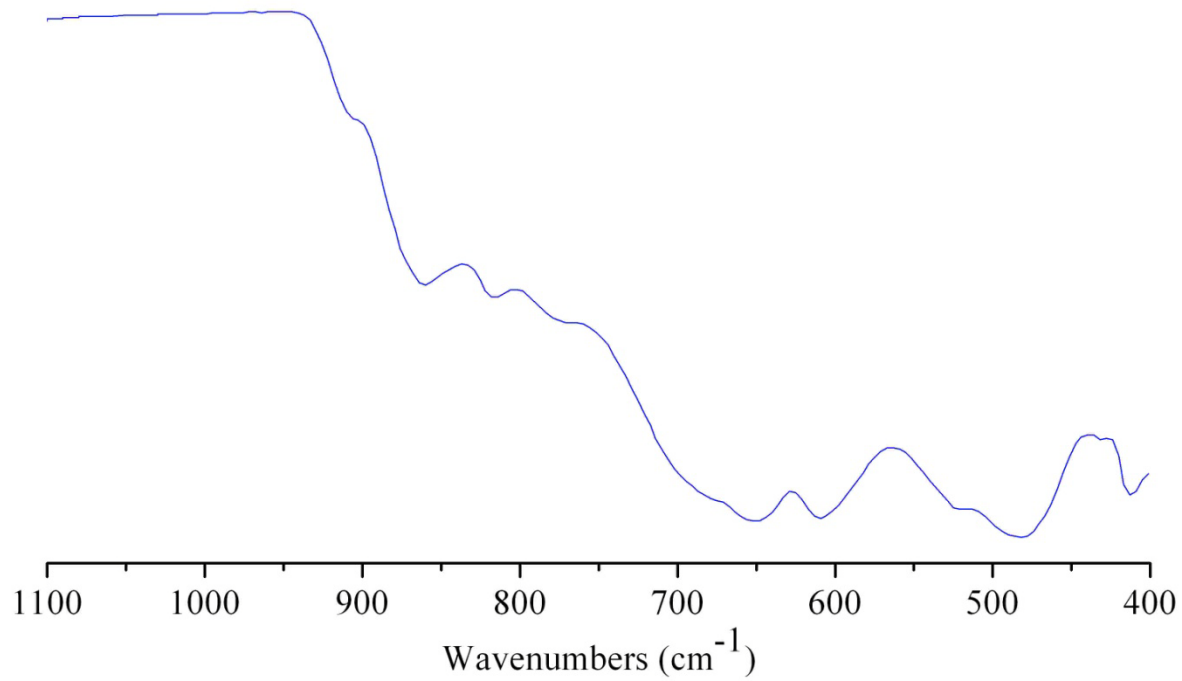

Fig. S1. IR spectra of **K1**.

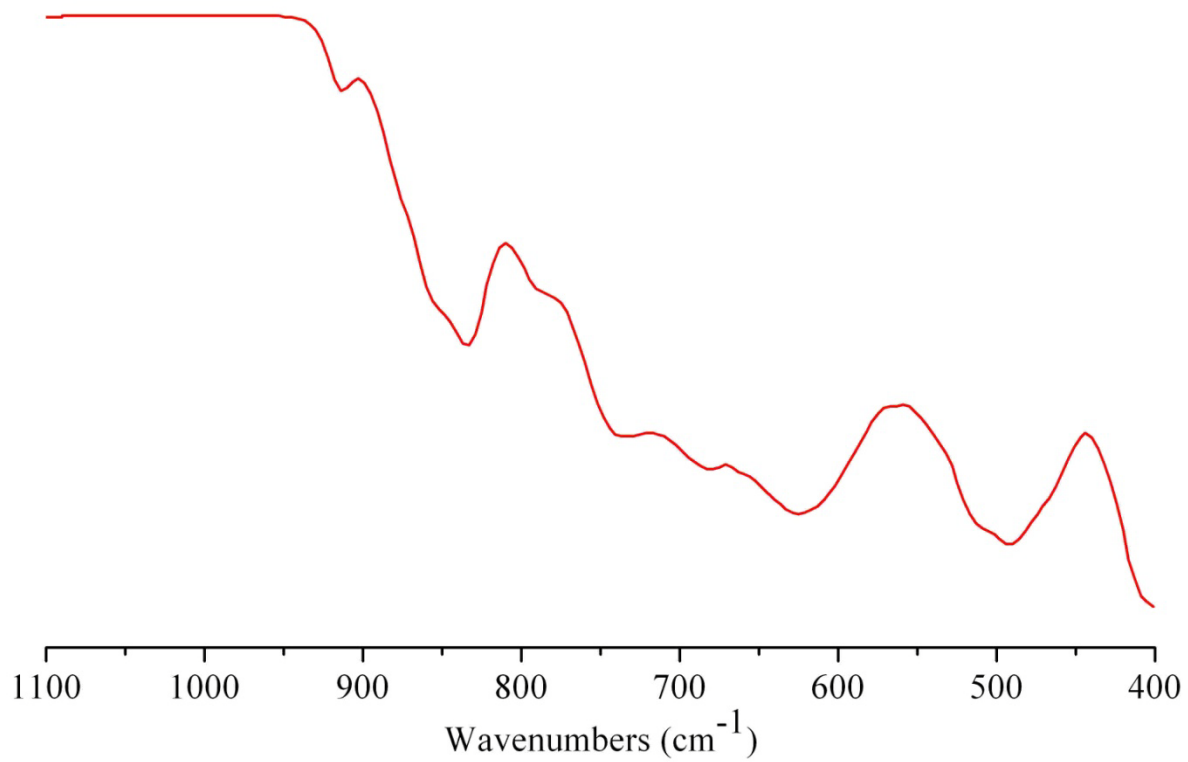

Fig. S2. IR spectra of **K2**.

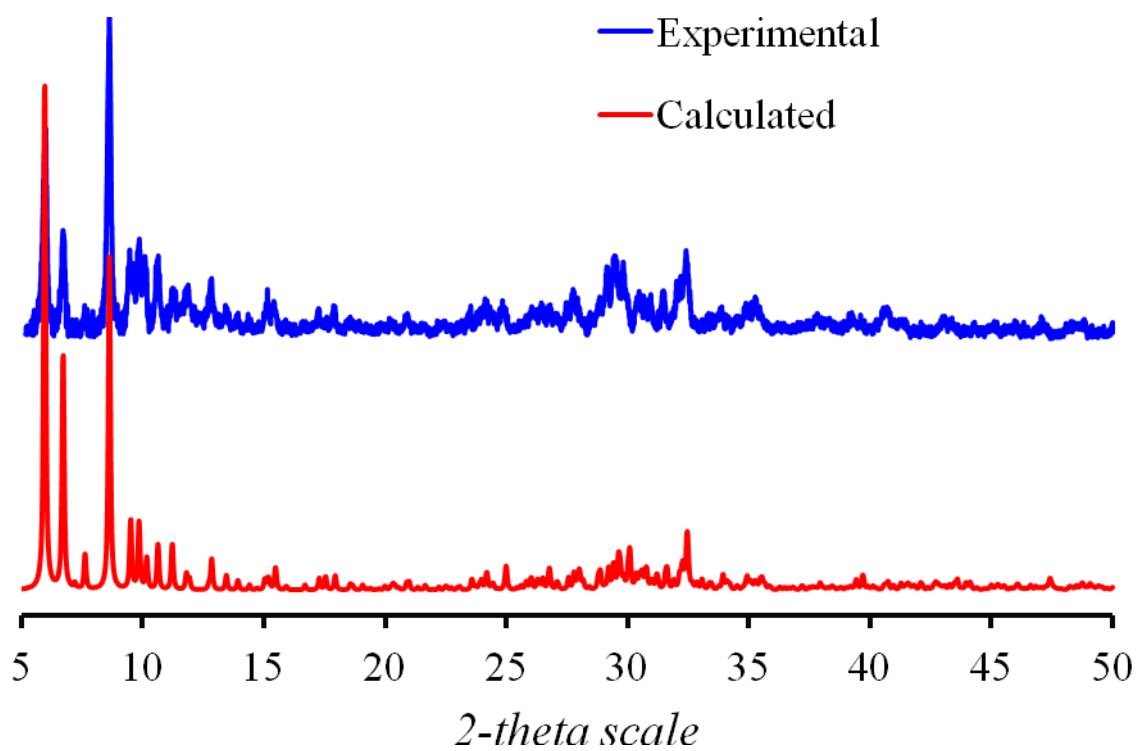

Fig. S3. X-ray powder diffraction of observed and calculated plots for **K1**.

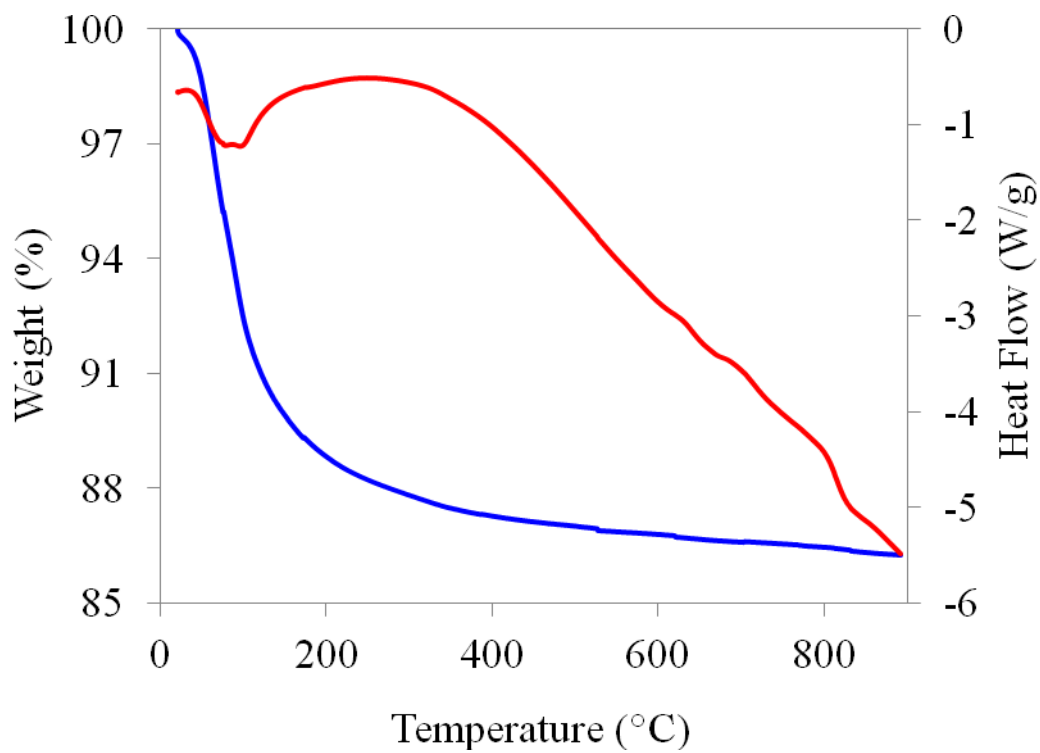

Fig. S5. Thermogravimetric (blue) differential thermal analysis (red) of **K1**.



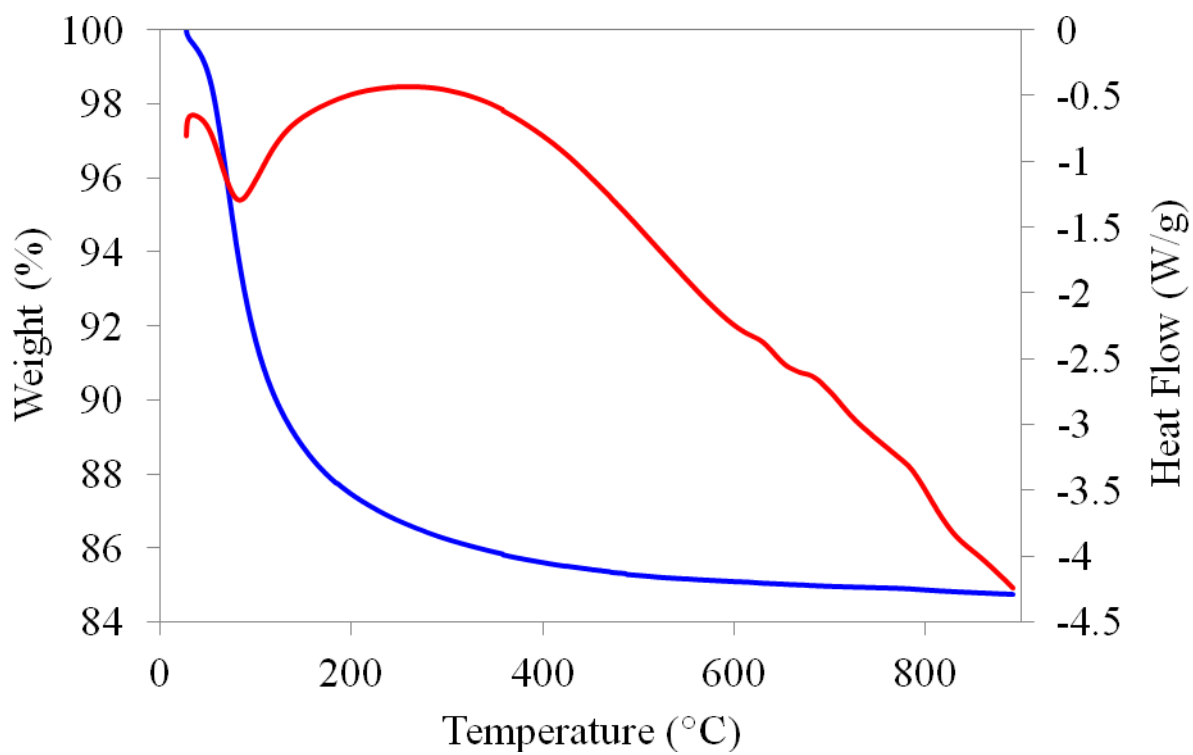

Fig. S6. Thermogravimetric (blue) differential thermal analysis (red) of **K2**.

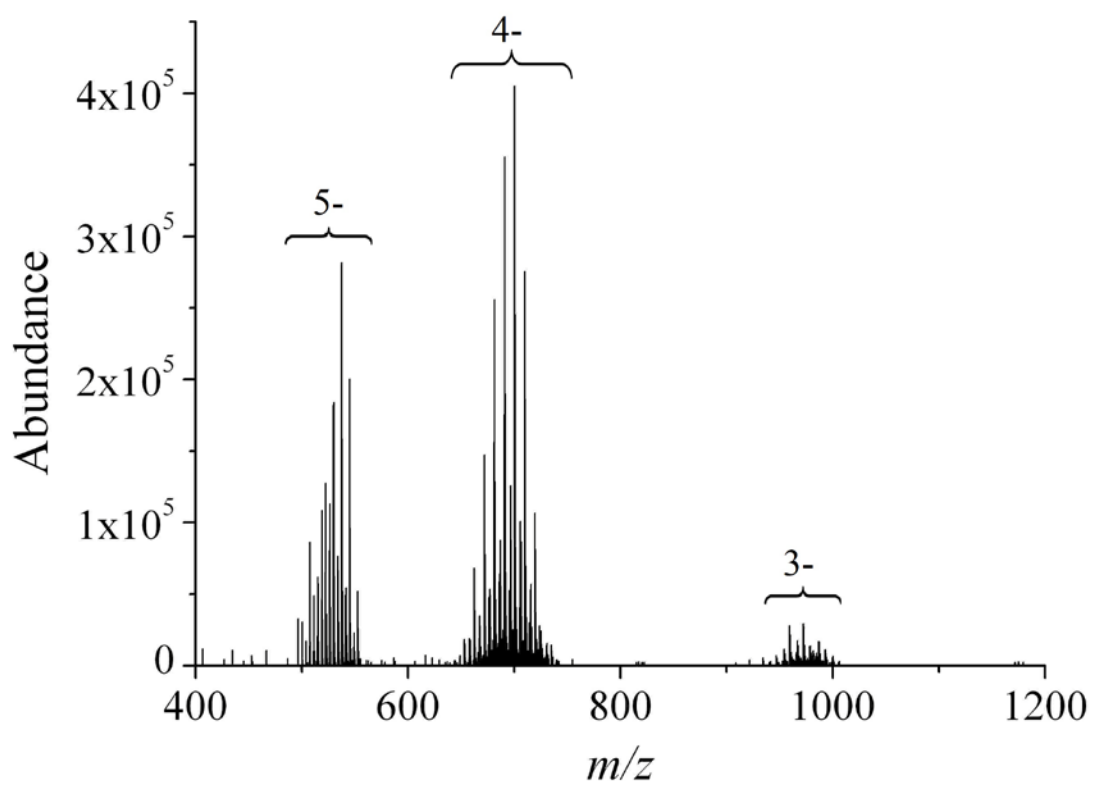

Fig. S7. ESI-MS for **K2**.

Table S3. Detailed assignment of mass spectral data for compound **K1**.

| m/z observed | polyanion                                                             | Mass calculated | m/z calculated |
|--------------|-----------------------------------------------------------------------|-----------------|----------------|
| 4-           |                                                                       |                 |                |
| 741.42       | $[\text{K}_5\text{Na}_5\text{H}_2\text{GaNb}_{18}\text{O}_{57}]^{4-}$ | 2964.73         | 741.18         |
| 737.43       | $[\text{K}_8\text{H}_2\text{GaNb}_{18}\text{O}_{56}]^{4-}$            | 2950.68         | 737.67         |
| 730.43       | $[\text{K}_5\text{Na}_3\text{H}_4\text{GaNb}_{18}\text{O}_{57}]^{4-}$ | 2920.77         | 730.19         |
| 726.44       | $[\text{K}_4\text{Na}_4\text{H}_4\text{GaNb}_{18}\text{O}_{57}]^{4-}$ | 2904.80         | 726.20         |
| 720.84       | $[\text{K}_4\text{Na}_3\text{H}_5\text{GaNb}_{18}\text{O}_{57}]^{4-}$ | 2882.81         | 720.70         |
| 716.95       | $[\text{K}_3\text{Na}_4\text{H}_5\text{GaNb}_{18}\text{O}_{57}]^{4-}$ | 2866.84         | 716.71         |
| 711.45       | $[\text{K}_3\text{Na}_3\text{H}_6\text{GaNb}_{18}\text{O}_{57}]^{4-}$ | 2844.86         | 711.21         |
| 707.45       | $[\text{K}_3\text{Na}_4\text{HGaNb}_{18}\text{O}_{55}]^{4-}$          | 2830.82         | 707.70         |
| 701.70       | $[\text{K}_4\text{Na}_2\text{GaNb}_{18}\text{O}_{54}]^{4-}$           | 2806.80         | 701.70         |
| 697.96       | $[\text{KNa}_4\text{H}_7\text{GaNb}_{18}\text{O}_{57}]^{4-}$          | 2790.92         | 697.73         |
| 697.71       | $[\text{K}_3\text{Na}_3\text{GaNb}_{18}\text{O}_{54}]^{4-}$           | 2790.83         | 697.71         |
| 692.47       | $[\text{KNa}_3\text{H}_8\text{GaNb}_{18}\text{O}_{57}]^{4-}$          | 2768.95         | 692.24         |
| 692.22       | $[\text{K}_3\text{Na}_2\text{HGaNb}_{18}\text{O}_{57}]^{4-}$          | 2768.84         | 692.21         |
| 687.97       | $[\text{K}_2\text{Na}_3\text{HGaNb}_{18}\text{O}_{54}]^{4-}$          | 2752.87         | 688.22         |
| 687.72       | $[\text{K}_6\text{H}_5\text{GaNb}_{17}\text{O}_{54}]^{4-}$            | 2750.88         | 687.72         |
| 682.72       | $[\text{K}_2\text{Na}_2\text{H}_2\text{GaNb}_{18}\text{O}_{54}]^{4-}$ | 2730.89         | 682.72         |
| 678.48       | $[\text{KNa}_3\text{H}_2\text{GaNb}_{18}\text{O}_{54}]^{4-}$          | 2714.91         | 678.73         |
| 678.23       | $[\text{K}_2\text{Na}_2\text{GaNb}_{18}\text{O}_{53}]^{4-}$           | 2712.88         | 678.22         |
| 673.49       | $[\text{Na}_3\text{H}_5\text{GaNb}_{18}\text{O}_{55}]^{4-}$           | 2694.97         | 673.74         |
| 673.23       | $[\text{KNa}_2\text{H}_3\text{GaNb}_{18}\text{O}_{54}]^{4-}$          | 2692.93         | 673.23         |
| 669.22       | $[\text{K}_5\text{H}_2\text{GaNb}_{17}\text{O}_{52}]^{4-}$            | 2676.90         | 669.23         |
| 668.99       | $[\text{K}_5\text{H}_2\text{GaNb}_{17}\text{O}_{52}]^{4-}$            | 2676.90         | 669.23         |
| 663.99       | $[\text{Na}_2\text{H}_4\text{GaNb}_{18}\text{O}_{54}]^{4-}$           | 2654.98         | 663.74         |
| 659.50       | $[\text{K}_4\text{H}_3\text{GaNb}_{17}\text{O}_{52}]^{4-}$            | 2638.95         | 659.74         |
| 654.51       | $[\text{K}_3\text{H}_6\text{GaNb}_{17}\text{O}_{53}]^{4-}$            | 2619.00         | 654.76         |
| 650.51       | $[\text{K}_3\text{H}_4\text{GaNb}_{17}\text{O}_{52}]^{4-}$            | 2600.99         | 650.25         |
| 3-           |                                                                       |                 |                |
| 948.93       | $[\text{K}_3\text{Na}_3\text{H}_7\text{GaNb}_{18}\text{O}_{57}]^{3-}$ | 2845.87         | 948.62         |
| 956.26       | $[\text{K}_3\text{Na}_4\text{H}_6\text{GaNb}_{18}\text{O}_{57}]^{3-}$ | 2867.85         | 955.95         |
| 961.58       | $[\text{K}_4\text{Na}_3\text{H}_6\text{GaNb}_{18}\text{O}_{57}]^{3-}$ | 2883.82         | 961.27         |
| 968.91       | $[\text{K}_4\text{Na}_4\text{H}_5\text{GaNb}_{18}\text{O}_{57}]^{3-}$ | 2905.80         | 968.60         |
| 974.24       | $[\text{K}_5\text{Na}_3\text{H}_5\text{GaNb}_{18}\text{O}_{57}]^{3-}$ | 2921.78         | 973.93         |
| 975.24       | $[\text{K}_5\text{Na}_4\text{H}_2\text{GaNb}_{18}\text{O}_{56}]^{3-}$ | 2925.75         | 975.25         |
| 981.56       | $[\text{K}_5\text{Na}_4\text{H}_4\text{GaNb}_{18}\text{O}_{57}]^{3-}$ | 2943.76         | 981.25         |
| 981.90       | $[\text{K}_4\text{Na}_5\text{H}_6\text{GaNb}_{18}\text{O}_{58}]^{3-}$ | 2945.80         | 981.93         |
| 986.89       | $[\text{K}_6\text{Na}_3\text{H}_4\text{GaNb}_{18}\text{O}_{57}]^{3-}$ | 2959.73         | 986.58         |
| 988.23       | $[\text{K}_6\text{Na}_4\text{HGaNb}_{18}\text{O}_{56}]^{3-}$          | 2963.70         | 987.90         |
| 987.56       | $[\text{K}_5\text{Na}_4\text{H}_6\text{GaNb}_{18}\text{O}_{58}]^{3-}$ | 2961.77         | 987.26         |
| 987.89       | $[\text{K}_6\text{Na}_4\text{HGaNb}_{18}\text{O}_{56}]^{3-}$          | 2963.71         | 987.90         |
| 996.23       | $[\text{K}_9\text{H}_2\text{GaNb}_{18}\text{O}_{56}]^{3-}$            | 2989.64         | 996.55         |
| 5-           |                                                                       |                 |                |
| 561.37       | $[\text{K}_8\text{GaNb}_{17}\text{O}_{53}]^{5-}$                      | 2807.77         | 561.56         |
| 557.77       | $[\text{K}_7\text{H}_3\text{GaNb}_{17}\text{O}_{54}]^{5-}$            | 2787.83         | 557.57         |
| 553.77       | $[\text{K}_7\text{HGaNb}_{17}\text{O}_{53}]^{5-}$                     | 2769.82         | 553.97         |
| 550.18       | $[\text{K}_2\text{Na}_3\text{GaNb}_{18}\text{O}_{54}]^{5-}$           | 2751.86         | 550.37         |
| 546.18       | $[\text{K}_6\text{H}_2\text{GaNb}_{17}\text{O}_{53}]^{5-}$            | 2731.86         | 546.37         |
| 542.58       | $[\text{K}_6\text{GaNb}_{17}\text{O}_{52}]^{5-}$                      | 2713.85         | 542.77         |
| 538.59       | $[\text{K}_5\text{H}_3\text{GaNb}_{17}\text{O}_{53}]^{5-}$            | 2693.91         | 538.78         |
| 534.99       | $[\text{K}_5\text{HGaNb}_{17}\text{O}_{52}]^{5-}$                     | 2675.90         | 535.18         |
| 530.99       | $[\text{K}_4\text{H}_4\text{GaNb}_{17}\text{O}_{53}]^{5-}$            | 2655.95         | 531.19         |
| 527.39       | $[\text{K}_4\text{H}_2\text{GaNb}_{17}\text{O}_{52}]^{5-}$            | 2637.94         | 527.59         |
| 523.79       | $[\text{K}_4\text{GaNb}_{17}\text{O}_{51}]^{5-}$                      | 2619.93         | 523.99         |
| 519.80       | $[\text{K}_3\text{H}_3\text{GaNb}_{17}\text{O}_{52}]^{5-}$            | 2599.98         | 519.99         |
| 516.20       | $[\text{K}_3\text{HGaNb}_{17}\text{O}_{51}]^{5-}$                     | 2581.97         | 516.40         |
| 512.20       | $[\text{K}_2\text{H}_4\text{GaNb}_{17}\text{O}_{52}]^{5-}$            | 2562.03         | 512.41         |
| 508.60       | $[\text{K}_2\text{H}_2\text{GaNb}_{17}\text{O}_{51}]^{5-}$            | 2544.02         | 508.80         |

Table S4. Detailed assignment of mass spectral data for compound **K2**.

| m/z observed | polyanion                                                                                         | Mass calculated | m/z calculated |
|--------------|---------------------------------------------------------------------------------------------------|-----------------|----------------|
| 4-           |                                                                                                   |                 |                |
| 653.02       | [KNaH <sub>2</sub> AlNb <sub>18</sub> O <sub>53</sub> ] <sup>4+</sup>                             | 2611.00         | 652.75         |
| 662.51       | [KNa <sub>2</sub> H <sub>3</sub> AlNb <sub>18</sub> O <sub>54</sub> ] <sup>4+</sup>               | 2650.99         | 662.75         |
| 667.50       | [K <sub>2</sub> Na <sub>2</sub> AlNb <sub>18</sub> O <sub>53</sub> ] <sup>4+</sup>                | 2670.93         | 667.73         |
| 681.49       | [K <sub>3</sub> Na <sub>2</sub> HAlNb <sub>18</sub> O <sub>54</sub> ] <sup>4+</sup>               | 2726.90         | 681.73         |
| 672.00       | [K <sub>2</sub> Na <sub>2</sub> H <sub>2</sub> AlNb <sub>18</sub> O <sub>54</sub> ] <sup>4+</sup> | 2688.94         | 672.24         |
| 676.99       | [K <sub>2</sub> Na <sub>2</sub> H <sub>4</sub> AlNb <sub>18</sub> O <sub>55</sub> ] <sup>4+</sup> | 2706.95         | 676.74         |
| 686.98       | [K <sub>3</sub> Na <sub>3</sub> AlNb <sub>18</sub> O <sub>54</sub> ] <sup>4+</sup>                | 2748.88         | 687.22         |
| 690.98       | [K <sub>4</sub> Na <sub>2</sub> AlNb <sub>18</sub> O <sub>54</sub> ] <sup>4+</sup>                | 2764.86         | 691.21         |
| 696.47       | [K <sub>3</sub> Na <sub>3</sub> H <sub>4</sub> AlNb <sub>18</sub> O <sub>56</sub> ] <sup>4+</sup> | 2784.90         | 696.23         |
| 700.47       | [K <sub>4</sub> Na <sub>2</sub> H <sub>4</sub> AlNb <sub>18</sub> O <sub>56</sub> ] <sup>4+</sup> | 2800.88         | 700.22         |
| 705.96       | [K <sub>4</sub> Na <sub>3</sub> H <sub>3</sub> AlNb <sub>18</sub> O <sub>56</sub> ] <sup>4+</sup> | 2822.86         | 705.72         |
| 709.96       | [K <sub>5</sub> Na <sub>2</sub> H <sub>3</sub> AlNb <sub>18</sub> O <sub>56</sub> ] <sup>4+</sup> | 2838.83         | 709.71         |
| 715.96       | [K <sub>4</sub> Na <sub>4</sub> H <sub>4</sub> AlNb <sub>18</sub> O <sub>57</sub> ] <sup>4+</sup> | 2862.85         | 715.71         |
| 719.45       | [K <sub>6</sub> Na <sub>2</sub> H <sub>2</sub> AlNb <sub>18</sub> O <sub>56</sub> ] <sup>4+</sup> | 2876.79         | 719.20         |
| 5-           |                                                                                                   |                 |                |
| 507.81       | [K <sub>3</sub> HAlNb <sub>17</sub> O <sub>51</sub> ] <sup>5-</sup>                               | 2540.03         | 508.01         |
| 511.41       | [K <sub>3</sub> H <sub>3</sub> AlNb <sub>17</sub> O <sub>52</sub> ] <sup>5-</sup>                 | 2558.04         | 511.61         |
| 515.01       | [K <sub>3</sub> H <sub>5</sub> AlNb <sub>17</sub> O <sub>53</sub> ] <sup>5-</sup>                 | 2576.05         | 515.21         |
| 519.00       | [K <sub>4</sub> H <sub>2</sub> AlNb <sub>17</sub> O <sub>52</sub> ] <sup>5-</sup>                 | 2596.00         | 519.20         |
| 522.61       | [K <sub>4</sub> H <sub>4</sub> AlNb <sub>17</sub> O <sub>53</sub> ] <sup>5-</sup>                 | 2614.01         | 522.80         |
| 526.60       | [K <sub>5</sub> HAlNb <sub>17</sub> O <sub>52</sub> ] <sup>5-</sup>                               | 2633.95         | 526.79         |
| 530.20       | [K <sub>5</sub> H <sub>3</sub> AlNb <sub>17</sub> O <sub>53</sub> ] <sup>5-</sup>                 | 2651.96         | 530.39         |
| 533.80       | [K <sub>5</sub> H <sub>5</sub> AlNb <sub>17</sub> O <sub>54</sub> ] <sup>5-</sup>                 | 2669.97         | 534.00         |
| 537.40       | [K <sub>2</sub> Na <sub>2</sub> HAlNb <sub>18</sub> O <sub>54</sub> ] <sup>5-</sup>               | 2687.94         | 537.59         |
| 541.79       | [K <sub>2</sub> Na <sub>3</sub> AlNb <sub>18</sub> O <sub>54</sub> ] <sup>5-</sup>                | 2709.92         | 541.98         |
| 544.99       | [K <sub>3</sub> Na <sub>2</sub> AlNb <sub>18</sub> O <sub>54</sub> ] <sup>5-</sup>                | 2725.89         | 545.18         |
| 549.39       | [K <sub>2</sub> Na <sub>3</sub> H <sub>4</sub> AlNb <sub>18</sub> O <sub>56</sub> ] <sup>5-</sup> | 2745.94         | 549.19         |
| 552.58       | [K <sub>3</sub> Na <sub>2</sub> H <sub>4</sub> AlNb <sub>18</sub> O <sub>56</sub> ] <sup>5-</sup> | 2761.91         | 552.38         |
| 3-           |                                                                                                   |                 |                |
| 921.64       | [K <sub>4</sub> Na <sub>2</sub> HAlNb <sub>18</sub> O <sub>54</sub> ] <sup>3-</sup>               | 2765.86         | 921.96         |
| 934.29       | [K <sub>5</sub> Na <sub>2</sub> AlNb <sub>18</sub> O <sub>54</sub> ] <sup>3-</sup>                | 2803.82         | 934.61         |
| 946.94       | [K <sub>5</sub> Na <sub>2</sub> H <sub>4</sub> AlNb <sub>18</sub> O <sub>56</sub> ] <sup>3-</sup> | 2839.84         | 946.61         |
| 954.27       | [K <sub>5</sub> Na <sub>3</sub> H <sub>3</sub> AlNb <sub>18</sub> O <sub>56</sub> ] <sup>3-</sup> | 2861.82         | 953.94         |
| 959.60       | [K <sub>6</sub> Na <sub>2</sub> H <sub>3</sub> AlNb <sub>18</sub> O <sub>56</sub> ] <sup>3-</sup> | 2877.80         | 959.27         |
| 966.92       | [K <sub>6</sub> Na <sub>3</sub> H <sub>2</sub> AlNb <sub>18</sub> O <sub>56</sub> ] <sup>3-</sup> | 2899.78         | 966.59         |
| 972.25       | [K <sub>7</sub> Na <sub>2</sub> H <sub>2</sub> AlNb <sub>18</sub> O <sub>56</sub> ] <sup>3-</sup> | 2915.75         | 971.92         |
| 981.59       | [K <sub>6</sub> Na <sub>5</sub> AlNb <sub>18</sub> O <sub>56</sub> ] <sup>3-</sup>                | 2943.74         | 981.25         |
| 984.91       | [K <sub>8</sub> Na <sub>2</sub> HAlNb <sub>18</sub> O <sub>56</sub> ] <sup>3-</sup>               | 2953.77         | 984.59         |
| 986.91       | [K <sub>7</sub> Na <sub>4</sub> AlNb <sub>18</sub> O <sub>56</sub> ] <sup>3-</sup>                | 2959.72         | 986.57         |
| 992.91       | [K <sub>7</sub> Na <sub>4</sub> H <sub>2</sub> AlNb <sub>18</sub> O <sub>57</sub> ] <sup>3-</sup> | 2977.73         | 992.58         |

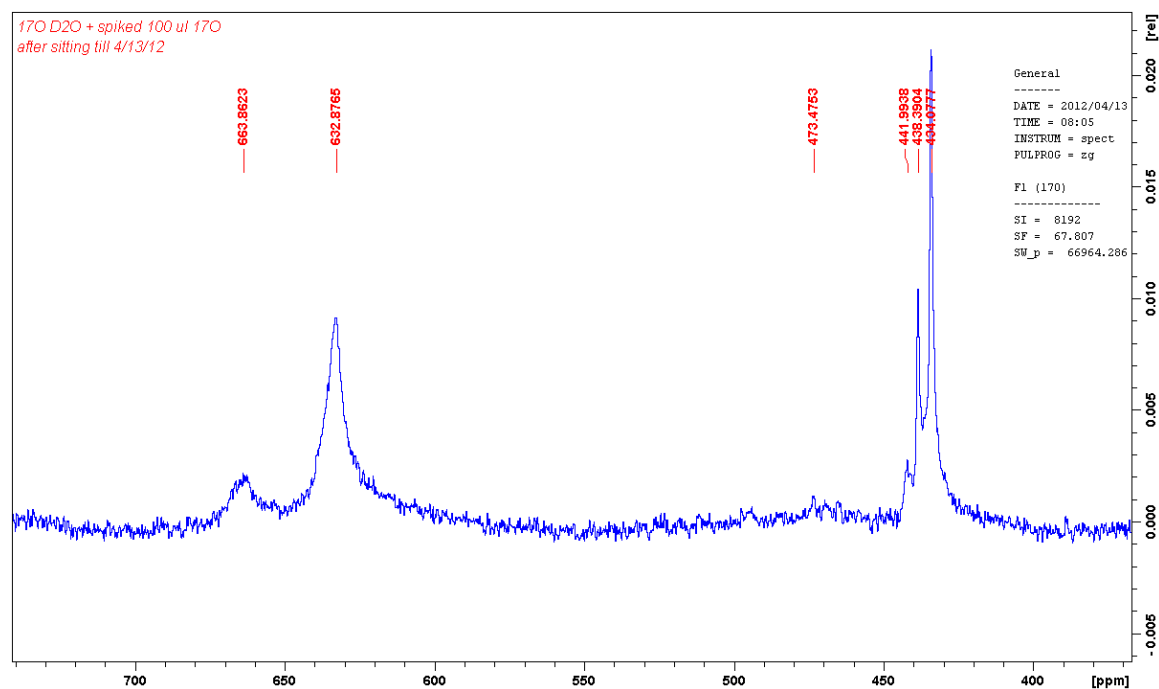

**Figure S8.**  $^{17}\text{O}$  NMR spectrum of K-salt of  $[\text{GaNb}_{18}\text{O}_{54}]^{15-}$  dissolved in 1 ml  $\text{D}_2\text{O}$  with 50 microliters  $^{17}\text{OH}_2$  (28%) added. Sharp peaks between 430 to 442 ppm are bridging  $\mu_2$ -oxo ligands of the polyniobate. Broader peaks between 630 to 670 ppm are the terminal Nb=O resonances of the polyniobate. The Ga-bound aqua ligands were not observable, like due to broadening and masking by the large peak of free water.
